# Supplementary material for: Parental Acceptance, Parental Hesitancy, and Uptake of Seasonal Influenza Vaccination among Children Aged 6–59 Months: A Systematic Review and Meta-Analysis
Source: MDPI journal article supplement (doi:10.3390/vaccines11081360), 2023-08-13
Supplement: s1 [file s1]

Table S1A Quality assessment of quantitative studies

| Author               | Study design                                                                   | Is the sampling strategy relevant to address the quantitative research question? | Is the sample representative of the population under study? | Are measurements appropriate (clear origin, or validity known, or standard instrument)? | Is there an acceptable response rate (60% or above)? |
|----------------------|--------------------------------------------------------------------------------|----------------------------------------------------------------------------------|-------------------------------------------------------------|-----------------------------------------------------------------------------------------|------------------------------------------------------|
| Bauer et al. 2021    | Quantitative:<br>cross-sectional<br>survey                                     | Yes                                                                              | No                                                          | Yes                                                                                     | No                                                   |
| Brown et al. 2011    | Quantitative:<br>cross-sectional<br>survey                                     | Yes                                                                              | Yes                                                         | Yes                                                                                     | Can't tell                                           |
| Bults et al. 2011    | Quantitative:<br>cross-sectional<br>survey                                     | Yes                                                                              | Yes                                                         | Yes                                                                                     | Yes                                                  |
| Chantler et al. 2007 | Mixed-method:<br>Semi-structured<br>interview and<br>cross-sectional<br>survey | Yes                                                                              | No                                                          | Yes                                                                                     | No                                                   |
| Chen et al. 2011     | Quantitative:<br>cross-sectional<br>survey                                     | Yes                                                                              | Yes                                                         | Yes                                                                                     | Yes                                                  |
| Chen et al. 2015     | Quantitative:                                                                  | Yes                                                                              | Yes                                                         | Yes                                                                                     | No                                                   |

---

|                     |                 |     |     |     |  |            |
|---------------------|-----------------|-----|-----|-----|--|------------|
|                     | cross-sectional |     |     |     |  |            |
|                     | survey          |     |     |     |  |            |
| Choi et al. 2017    | Quantitative:   | Yes | Yes | Yes |  | Can't tell |
|                     | cross-sectional |     |     |     |  |            |
|                     | survey          |     |     |     |  |            |
| Daley et al. 2007   | Quantitative:   | Yes | Yes | Yes |  | No         |
|                     | cross-sectional |     |     |     |  |            |
|                     | survey          |     |     |     |  |            |
| Fisher et al. 2022  | Quantitative:   | Yes | Yes | No  |  | Can't tell |
|                     | cross-sectional |     |     |     |  |            |
|                     | survey          |     |     |     |  |            |
| Frawley et al. 2020 | Quantitative:   | Yes | Yes | Yes |  | No         |
|                     | cross-sectional |     |     |     |  |            |
|                     | survey          |     |     |     |  |            |
| Ganczak et al. 2013 |                 | Yes | Yes | Yes |  | Yes        |
| Gentile et al. 2015 | Quantitative:   | Yes | Yes | Yes |  | Can't tell |
|                     | cross-sectional |     |     |     |  |            |
|                     | survey          |     |     |     |  |            |
| Han et al. 2022     | Quantitative:   | Yes | Yes | Yes |  | Can't tell |
|                     | cross-sectional |     |     |     |  |            |
|                     | survey          |     |     |     |  |            |
| He et al. 2015      | Quantitative:   | Yes | No  | Yes |  | Can't tell |
|                     | cross-sectional |     |     |     |  |            |
|                     | survey          |     |     |     |  |            |
| Hemingway et al.    | Quantitative:   | Yes | No  | Yes |  | Can't tell |

---

|                      |                                            |     |     |     |            |
|----------------------|--------------------------------------------|-----|-----|-----|------------|
| 2004                 | cross-sectional<br>survey                  |     |     |     |            |
| Humiston et al. 2005 | Quantitative:<br>cross-sectional<br>survey | Yes | No  | Yes | Can't tell |
| Lai et al. 2022      | Quantitative:<br>cross-sectional<br>survey | Yes | Yes | Yes | Can't tell |
| Lau et al. 2021      | Quantitative:<br>cross-sectional<br>survey | Yes | Yes | Yes | Yes        |
| Lau et al. 2013      | Quantitative:<br>cross-sectional<br>survey | Yes | Yes | Yes | Yes        |
| Low et al. 2017      | Quantitative:<br>cross-sectional<br>survey | Yes | Yes | Yes | Can't tell |
| Ma et al. 2006       | Quantitative:<br>cross-sectional<br>survey | Yes | No  | Yes | Yes        |
| Nowalk et al. 2005   | Quantitative:<br>cross-sectional<br>survey | Yes | Yes | Yes | No         |
| Nowalk et al. 2007   | Quantitative:<br>cross-sectional           | Yes | Yes | Yes | No         |

|                             |                                            |     |     |     |            |
|-----------------------------|--------------------------------------------|-----|-----|-----|------------|
|                             | survey                                     |     |     |     |            |
| Schuller et al. 2013        | Quantitative:<br>cross-sectional<br>survey | Yes | Yes | Yes | Can't tell |
| Schellenberg et al.<br>2023 | Quantitative:<br>cross-sectional<br>survey | Yes | Yes | Yes | Yes        |
| Shinall et al. 2007         | Quantitative:<br>cross-sectional<br>survey | Yes | No  | Yes | Yes        |
| Thanee et al. 2021          | Quantitative:<br>cross-sectional<br>survey | Yes | Yes | Yes | Can't tell |
| van Lier et al. 2017        | Quantitative:<br>cross-sectional<br>survey | Yes | Yes | Yes | No         |
| Wei et al. 2021             | Quantitative:<br>cross-sectional<br>survey | Yes | Yes | Yes | Yes        |
| Williams et al. 2021        | Quantitative:<br>cross-sectional<br>survey | Yes | Yes | Yes | Yes        |
| Wu et al. 2015              | Quantitative:<br>cross-sectional<br>survey | Yes | Yes | Yes | Can't tell |

|                   |                                            |     |     |     |            |
|-------------------|--------------------------------------------|-----|-----|-----|------------|
| Wu et al. 2020    | Quantitative:<br>cross-sectional<br>survey | Yes | Yes | Yes | Yes        |
| Wu et al. 2023    | Quantitative:<br>cross-sectional<br>survey | Yes | Yes | Yes | Can't tell |
| Zhang et al. 2022 | Quantitative:<br>cross-sectional<br>survey | Yes | Yes | Yes | No         |

Table S1B Quality assessment of qualitative studies

| Author               | Study design                                                       | Are the sources of qualitative data (archives, documents, informants, observations) relevant to address the research question (objective)? | Is the process for analyzing qualitative data relevant to address the research question (objective)? | Is appropriate consideration given to how findings relate to the context, e.g., the setting, in which the data were collected? | Is appropriate consideration given to how findings relate to researchers' influence, e.g., through their interactions with participants? |
|----------------------|--------------------------------------------------------------------|--------------------------------------------------------------------------------------------------------------------------------------------|------------------------------------------------------------------------------------------------------|--------------------------------------------------------------------------------------------------------------------------------|------------------------------------------------------------------------------------------------------------------------------------------|
| Biezen et al. 2018   | Qualitative: focus group                                           | Yes                                                                                                                                        | Yes                                                                                                  | Yes                                                                                                                            | No                                                                                                                                       |
| Chantler et al. 2007 | Mixed-method: Semi-structured interview and cross-sectional survey | Yes                                                                                                                                        | Yes                                                                                                  | Yes                                                                                                                            | No                                                                                                                                       |
| Price et al., 2022   | Qualitative: semi-structured interview                             | Yes                                                                                                                                        | Yes                                                                                                  | Yes                                                                                                                            | No                                                                                                                                       |

Table S1C Quality assessment of mixed-method study

| Author               | Study design                                                       | Is the mixed methods research design relevant to address the qualitative and quantitative research questions (or objectives), or the qualitative and quantitative aspects of the mixed methods question (or objective)? | Is the integration of qualitative and quantitative data (or results) relevant to address the research question (objective)? | Is appropriate consideration given to the limitations associated with this integration, e.g. the divergence of qualitative and quantitative data? |
|----------------------|--------------------------------------------------------------------|-------------------------------------------------------------------------------------------------------------------------------------------------------------------------------------------------------------------------|-----------------------------------------------------------------------------------------------------------------------------|---------------------------------------------------------------------------------------------------------------------------------------------------|
| Chantler et al. 2007 | Mixed-method: Semi-structured interview and cross-sectional survey | Yes                                                                                                                                                                                                                     | Yes                                                                                                                         | No                                                                                                                                                |

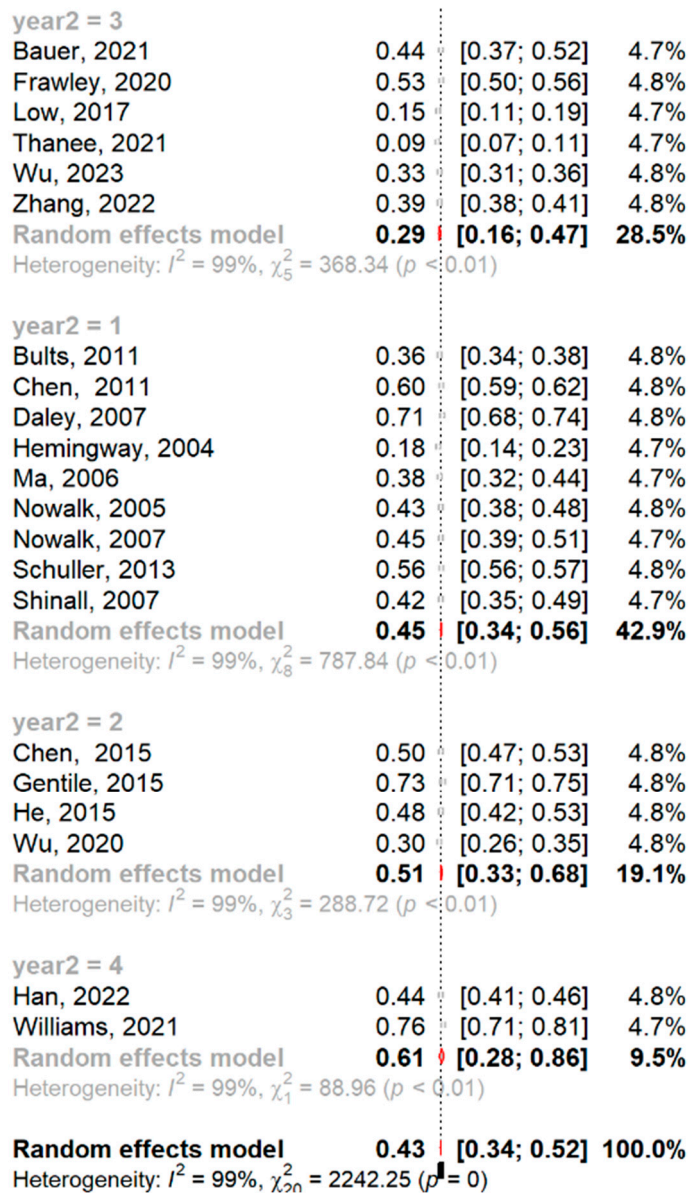

Figure S1A Forest plot of subgroup analysis of the uptake in the last flu season by year



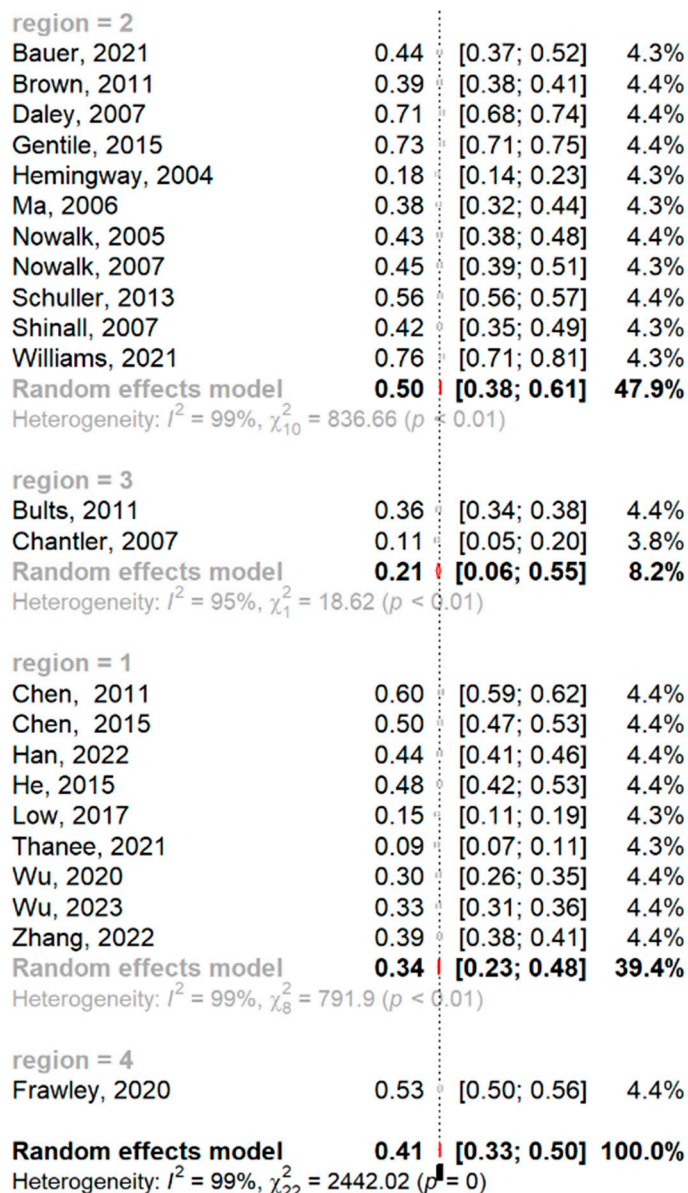

Figure S1B Forest plot of subgroup analysis of the uptake in the last flu season by region

| Study                                                               | Proportion  | 95%-CI              | Weight        |
|---------------------------------------------------------------------|-------------|---------------------|---------------|
| <b>size = 1</b>                                                     |             |                     |               |
| Bauer, 2021                                                         | 0.44        | [0.37; 0.52]        | 4.3%          |
| Chantler, 2007                                                      | 0.11        | [0.05; 0.20]        | 3.8%          |
| Daley, 2007                                                         | 0.71        | [0.68; 0.74]        | 4.4%          |
| He, 2015                                                            | 0.48        | [0.42; 0.53]        | 4.4%          |
| Hemingway, 2004                                                     | 0.18        | [0.14; 0.23]        | 4.3%          |
| Low, 2017                                                           | 0.15        | [0.11; 0.19]        | 4.3%          |
| Ma, 2006                                                            | 0.38        | [0.32; 0.44]        | 4.3%          |
| Nowalk, 2005                                                        | 0.43        | [0.38; 0.48]        | 4.4%          |
| Nowalk, 2007                                                        | 0.45        | [0.39; 0.51]        | 4.3%          |
| Shinall, 2007                                                       | 0.42        | [0.35; 0.49]        | 4.3%          |
| Thanee, 2021                                                        | 0.09        | [0.07; 0.11]        | 4.3%          |
| Williams, 2021                                                      | 0.76        | [0.71; 0.81]        | 4.3%          |
| Wu, 2020                                                            | 0.30        | [0.26; 0.35]        | 4.4%          |
| <b>Random effects model</b>                                         | <b>0.35</b> | <b>[0.23; 0.49]</b> | <b>55.8%</b>  |
| Heterogeneity: $I^2 = 99\%$ , $\chi^2_{12} = 801.84$ ( $p = 0.01$ ) |             |                     |               |
| <b>size = 2</b>                                                     |             |                     |               |
| Brown, 2011                                                         | 0.39        | [0.38; 0.41]        | 4.4%          |
| Bults, 2011                                                         | 0.36        | [0.34; 0.38]        | 4.4%          |
| Chen, 2011                                                          | 0.60        | [0.59; 0.62]        | 4.4%          |
| Chen, 2015                                                          | 0.50        | [0.47; 0.53]        | 4.4%          |
| Frawley, 2020                                                       | 0.53        | [0.50; 0.56]        | 4.4%          |
| Gentile, 2015                                                       | 0.73        | [0.71; 0.75]        | 4.4%          |
| Han, 2022                                                           | 0.44        | [0.41; 0.46]        | 4.4%          |
| Schuller, 2013                                                      | 0.56        | [0.56; 0.57]        | 4.4%          |
| Wu, 2023                                                            | 0.33        | [0.31; 0.36]        | 4.4%          |
| Zhang, 2022                                                         | 0.39        | [0.38; 0.41]        | 4.4%          |
| <b>Random effects model</b>                                         | <b>0.48</b> | <b>[0.40; 0.57]</b> | <b>44.2%</b>  |
| Heterogeneity: $I^2 = 99\%$ , $\chi^2_9 = 1533.42$ ( $p = 0$ )      |             |                     |               |
| <b>Random effects model</b>                                         | <b>0.41</b> | <b>[0.33; 0.50]</b> | <b>100.0%</b> |
| Heterogeneity: $I^2 = 99\%$ , $\chi^2_{22} = 2442.02$ ( $p = 0$ )   |             |                     |               |

Figure S1C Forest plot of subgroup analysis of the uptake in the last flu season by sample size

| Study                                                             | Proportion  | 95%-CI              | Weight        |
|-------------------------------------------------------------------|-------------|---------------------|---------------|
| <b>year2 = 1</b>                                                  |             |                     |               |
| Ganczak et al. 2013                                               | 0.78        | [0.73; 0.82]        | 20.0%         |
| Lau et al. 2013                                                   | 0.09        | [0.06; 0.12]        | 19.9%         |
| <b>Random effects model</b>                                       | <b>0.37</b> | <b>[0.02; 0.95]</b> | <b>39.8%</b>  |
| Heterogeneity: $I^2 = 100\%$ , $\chi^2_1 = 259.13$ ( $p < 0.01$ ) |             |                     |               |
| <b>year2 = 3</b>                                                  |             |                     |               |
| Low et al. 2017                                                   | 0.32        | [0.27; 0.37]        | 20.0%         |
| <b>year2 = 2</b>                                                  |             |                     |               |
| Wu et al. 2015                                                    | 0.59        | [0.55; 0.63]        | 20.1%         |
| Wu et al. 2020                                                    | 0.63        | [0.58; 0.68]        | 20.1%         |
| <b>Random effects model</b>                                       | <b>0.61</b> | <b>[0.57; 0.65]</b> | <b>40.2%</b>  |
| Heterogeneity: $I^2 = 47\%$ , $\chi^2_1 = 1.87$ ( $p = 0.17$ )    |             |                     |               |
| <b>Random effects model</b>                                       | <b>0.46</b> | <b>[0.20; 0.74]</b> | <b>100.0%</b> |
| Heterogeneity: $I^2 = 99\%$ , $\chi^2_4 = 344.39$ ( $p < 0.01$ )  |             |                     |               |

Figure S2A Forest plot of subgroup analysis of the uptake in lifetime by year

| Study                                                            | Proportion  | 95%-CI              | Weight        |
|------------------------------------------------------------------|-------------|---------------------|---------------|
| <b>region = 3</b>                                                |             |                     |               |
| Ganczak et al. 2013                                              | 0.78        | [0.73; 0.82]        | 20.0%         |
| <b>region = 1</b>                                                |             |                     |               |
| Lau et al. 2013                                                  | 0.09        | [0.06; 0.12]        | 19.9%         |
| Low et al. 2017                                                  | 0.32        | [0.27; 0.37]        | 20.0%         |
| Wu et al. 2015                                                   | 0.59        | [0.55; 0.63]        | 20.1%         |
| Wu et al. 2020                                                   | 0.63        | [0.58; 0.68]        | 20.1%         |
| <b>Random effects model</b>                                      | <b>0.37</b> | <b>[0.14; 0.68]</b> | <b>80.0%</b>  |
| Heterogeneity: $I^2 = 99\%$ , $\chi^2_3 = 261.55$ ( $p < 0.01$ ) |             |                     |               |
| <b>Random effects model</b>                                      | <b>0.46</b> | <b>[0.20; 0.74]</b> | <b>100.0%</b> |
| Heterogeneity: $I^2 = 99\%$ , $\chi^2_4 = 344.39$ ( $p < 0.01$ ) |             |                     |               |

Figure S2B Forest plot of subgroup analysis of the uptake in lifetime by region

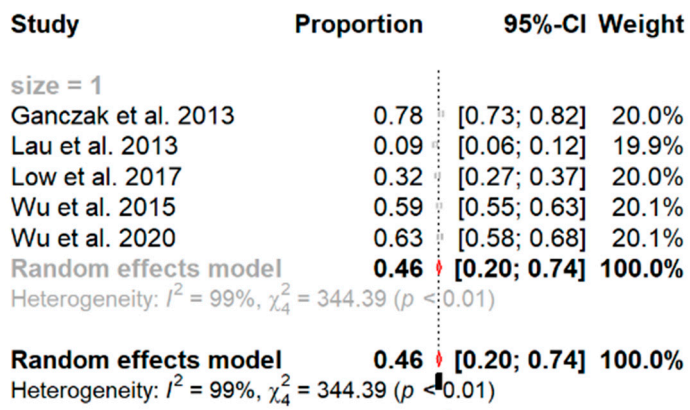

Figure S2C Forest plot of subgroup analysis of the uptake in lifetime by sample size

| Study                                                              | Proportion  | 95%-CI              | Weight        |
|--------------------------------------------------------------------|-------------|---------------------|---------------|
| <b>year2 = 3</b>                                                   |             |                     |               |
| Bauer et al. 2021                                                  | 0.71        | [0.63; 0.78]        | 7.0%          |
| Fisher et al. 2022                                                 | 0.66        | [0.59; 0.73]        | 7.1%          |
| Lai et al. 2022                                                    | 0.39        | [0.37; 0.40]        | 7.2%          |
| Schellenberg et al. 2023                                           | 0.88        | [0.87; 0.89]        | 7.2%          |
| Wei et al. 2021                                                    | 0.57        | [0.54; 0.59]        | 7.2%          |
| Wu et al. 2023                                                     | 0.40        | [0.37; 0.43]        | 7.2%          |
| <b>Random effects model</b>                                        | <b>0.62</b> | <b>[0.44; 0.77]</b> | <b>43.0%</b>  |
| Heterogeneity: $I^2 = 100\%$ , $\chi^2_5 = 2905.62$ ( $p = 0$ )    |             |                     |               |
| <b>year2 = 2</b>                                                   |             |                     |               |
| Chen et al. 2015                                                   | 0.73        | [0.70; 0.75]        | 7.2%          |
| Choi et al. 2017                                                   | 0.84        | [0.80; 0.86]        | 7.2%          |
| He et al. 2015                                                     | 0.62        | [0.57; 0.68]        | 7.1%          |
| Lau et al. 2021                                                    | 0.69        | [0.65; 0.73]        | 7.2%          |
| van Lier et al. 2017                                               | 0.15        | [0.12; 0.19]        | 7.1%          |
| Wu et al. 2020                                                     | 0.49        | [0.45; 0.54]        | 7.2%          |
| <b>Random effects model</b>                                        | <b>0.59</b> | <b>[0.36; 0.78]</b> | <b>43.0%</b>  |
| Heterogeneity: $I^2 = 99\%$ , $\chi^2_5 = 521.51$ ( $p < 0.01$ )   |             |                     |               |
| <b>year2 = 1</b>                                                   |             |                     |               |
| Humiston et al. 2005                                               | 0.78        | [0.70; 0.84]        | 7.0%          |
| <b>year2 = 4</b>                                                   |             |                     |               |
| Williams et al. 2021                                               | 0.87        | [0.82; 0.91]        | 7.0%          |
| <b>Random effects model</b>                                        | <b>0.64</b> | <b>[0.51; 0.75]</b> | <b>100.0%</b> |
| Heterogeneity: $I^2 = 100\%$ , $\chi^2_{13} = 3619.22$ ( $p = 0$ ) |             |                     |               |

Figure S3A Forest plot of subgroup analysis of the parental acceptance by year

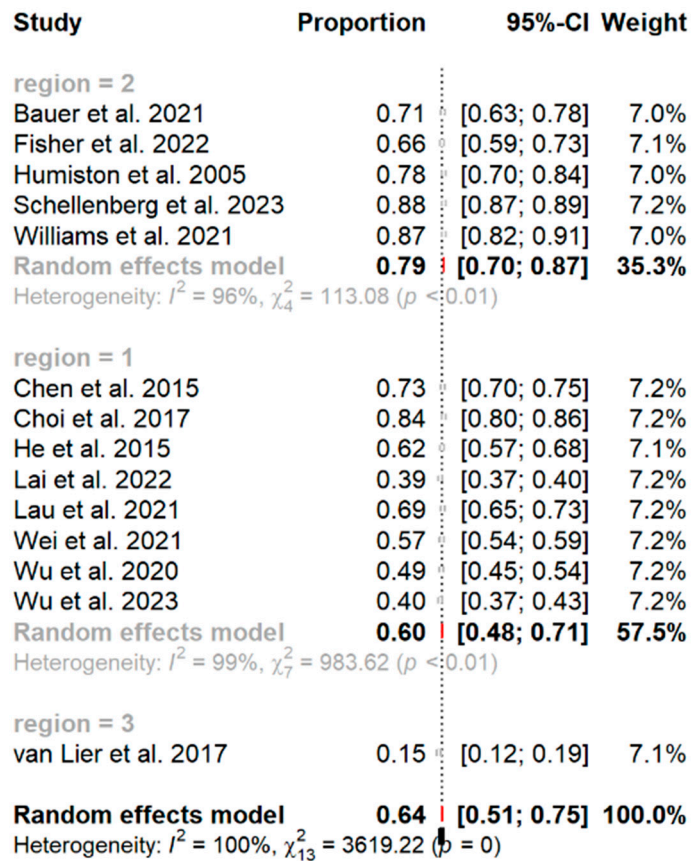

Figure S3B Forest plot of subgroup analysis of the parental acceptance by region

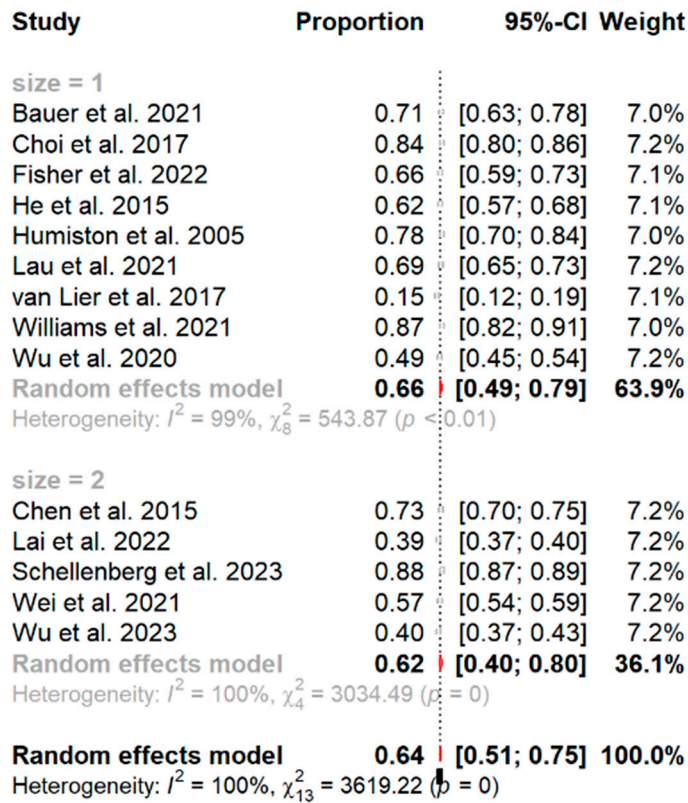

Figure S3C Forest plot of subgroup analysis of the parental acceptance by sample size



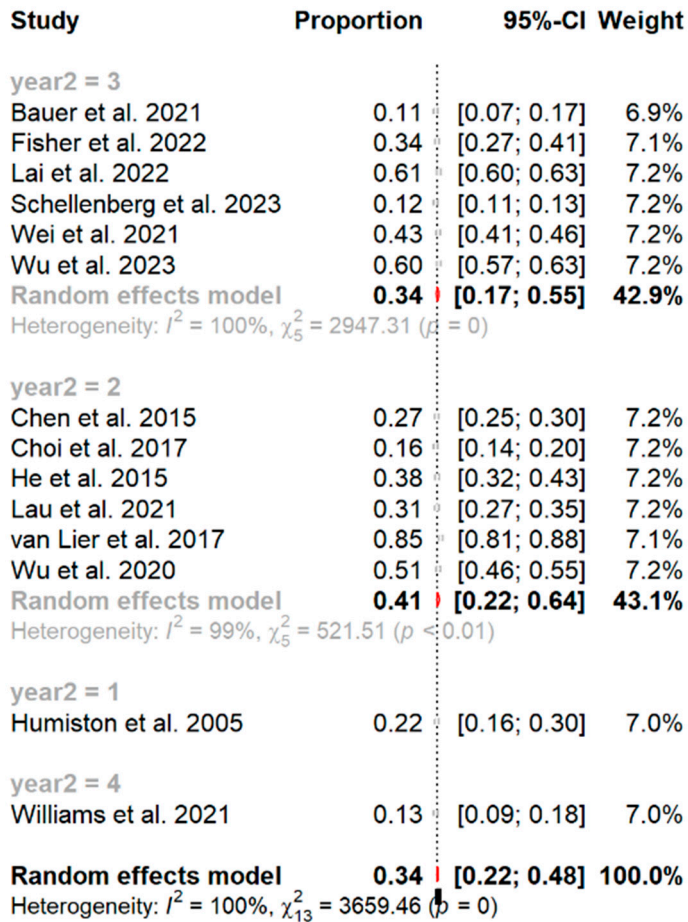

Figure S4A Forest plot of subgroup analysis of the parental hesitancy by year

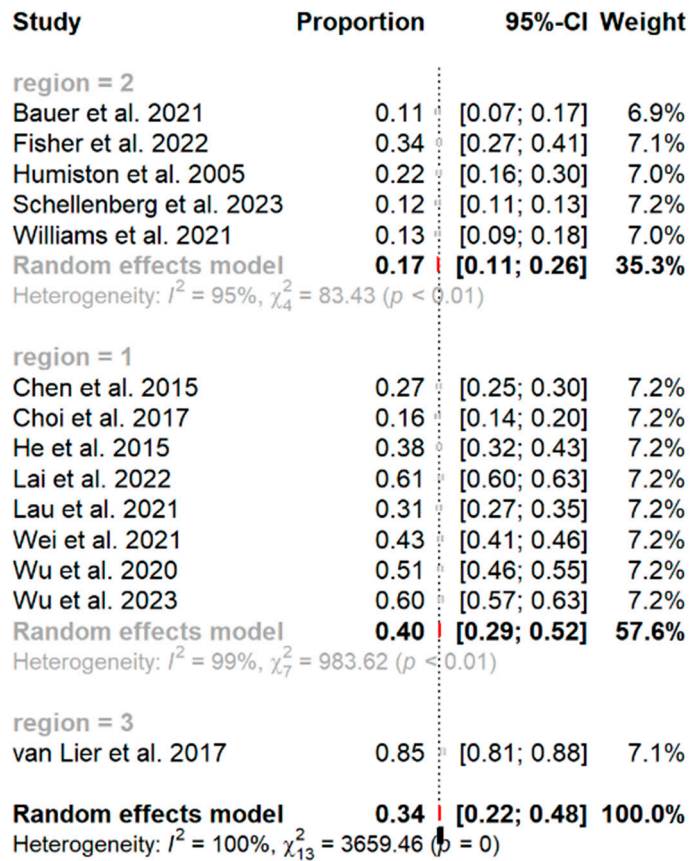

Figure S4B Forest plot of subgroup analysis of the parental hesitancy by region

| Study                                                              | Proportion  | 95%-CI              | Weight        |
|--------------------------------------------------------------------|-------------|---------------------|---------------|
| <b>size = 1</b>                                                    |             |                     |               |
| Bauer et al. 2021                                                  | 0.11        | [0.07; 0.17]        | 6.9%          |
| Choi et al. 2017                                                   | 0.16        | [0.14; 0.20]        | 7.2%          |
| Fisher et al. 2022                                                 | 0.34        | [0.27; 0.41]        | 7.1%          |
| He et al. 2015                                                     | 0.38        | [0.32; 0.43]        | 7.2%          |
| Humiston et al. 2005                                               | 0.22        | [0.16; 0.30]        | 7.0%          |
| Lau et al. 2021                                                    | 0.31        | [0.27; 0.35]        | 7.2%          |
| van Lier et al. 2017                                               | 0.85        | [0.81; 0.88]        | 7.1%          |
| Williams et al. 2021                                               | 0.13        | [0.09; 0.18]        | 7.0%          |
| Wu et al. 2020                                                     | 0.51        | [0.46; 0.55]        | 7.2%          |
| <b>Random effects model</b>                                        | <b>0.31</b> | <b>[0.18; 0.50]</b> | <b>63.9%</b>  |
| Heterogeneity: $I^2 = 99\%$ , $\chi^2_8 = 578.66$ ( $p < 0.01$ )   |             |                     |               |
| <b>size = 2</b>                                                    |             |                     |               |
| Chen et al. 2015                                                   | 0.27        | [0.25; 0.30]        | 7.2%          |
| Lai et al. 2022                                                    | 0.61        | [0.60; 0.63]        | 7.2%          |
| Schellenberg et al. 2023                                           | 0.12        | [0.11; 0.13]        | 7.2%          |
| Wei et al. 2021                                                    | 0.43        | [0.41; 0.46]        | 7.2%          |
| Wu et al. 2023                                                     | 0.60        | [0.57; 0.63]        | 7.2%          |
| <b>Random effects model</b>                                        | <b>0.38</b> | <b>[0.20; 0.60]</b> | <b>36.1%</b>  |
| Heterogeneity: $I^2 = 100\%$ , $\chi^2_4 = 3034.49$ ( $p = 0$ )    |             |                     |               |
| <b>Random effects model</b>                                        | <b>0.34</b> | <b>[0.22; 0.48]</b> | <b>100.0%</b> |
| Heterogeneity: $I^2 = 100\%$ , $\chi^2_{13} = 3659.46$ ( $p = 0$ ) |             |                     |               |

Figure S4C Forest plot of subgroup analysis of the parental hesitancy by sample size
